# Supplementary material for: Ferulic Acid-NLC with Lavandula Essential Oil: A Possible Strategy for Wound-Healing?
Source: MDPI journal article supplement (doi:10.3390/nano10050898), 2020-05-08
Supplement: s1 [file s1]

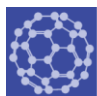

Supplementary Materials

# Ferulic Acid-NLC with *Lavandula* Essential Oil: A Possible Strategy for Wound-Healing?

Claudia Carbone <sup>1,\*</sup>, Carla Caddeo <sup>2</sup>, Maria Aurora Grimaudo <sup>3</sup>, Daniela Manno <sup>4</sup>, Antonio Serra <sup>4</sup>, Teresa Musumeci <sup>1</sup>

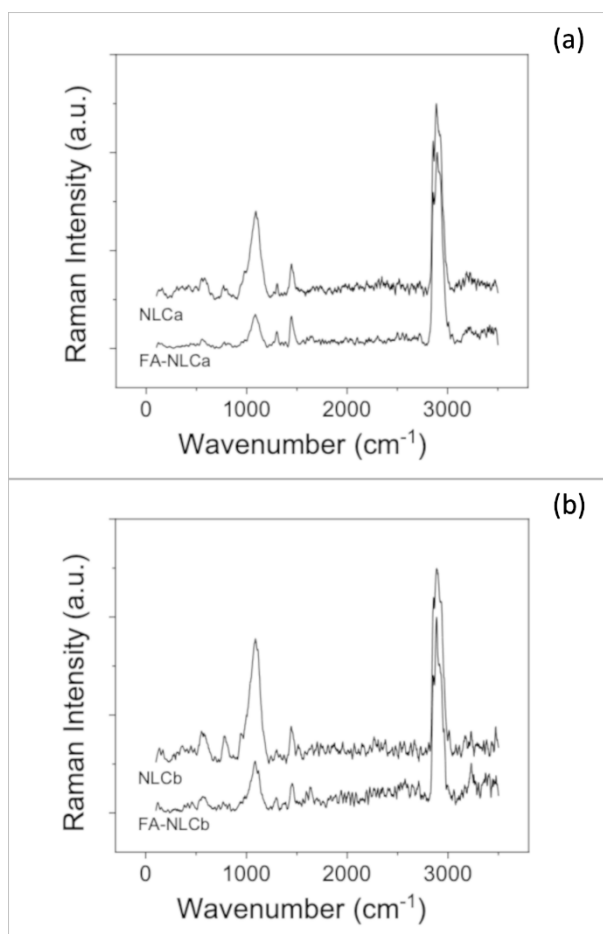

**Figure S1.** Survey Raman spectra of different analyzed systems. The region of interest ( $850\text{--}1250\text{ cm}^{-1}$  and from  $2725\text{--}3125\text{ cm}^{-1}$ ) are enlarged and discussed in the text.

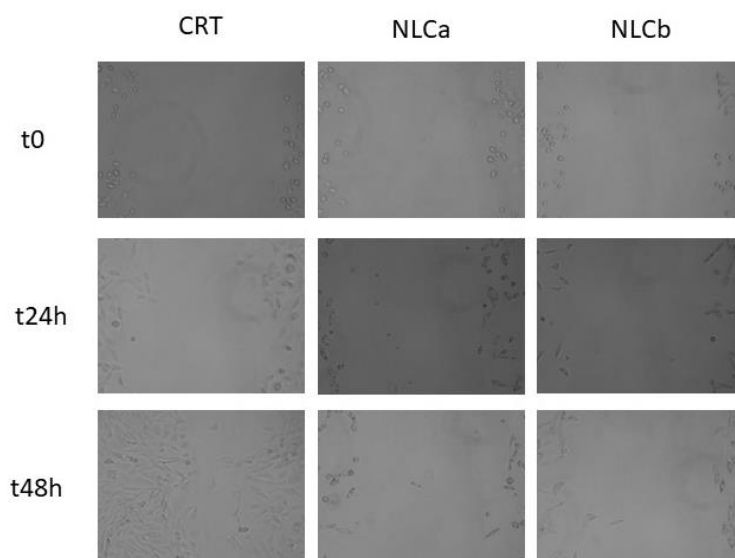

**Figure S2.** Photographs of the gaps among fibroblast cells at 0, 24 and 48 h after incubation (at 37 °C in 5% CO<sub>2</sub> and 95% relative humidity) with control, unloaded NLCa and unloaded NLCb.

**Table S1.** Quali-quantitative composition of blank and Fa-loaded NLC prepared using IPM (NLCa) or *Lavandula* EO (NLCb) as liquid oily phase.

| Batch     | NLCa      | NLCb                       |
|-----------|-----------|----------------------------|
| Compound  | % w/V     | % w/V                      |
| Kolliphor | 4.5       | 4.5                        |
| Labrafil  | 2.0       | 2.0                        |
| Softisan  | 2.0       | 2.0                        |
| Oil       | 5.0 (IPM) | 5.0 ( <i>Lavandula</i> EO) |

**Table S2.** Mean particle size (Zave, nm), polydispersity index (PDI) and zeta potential (ZP)  $\pm$  standard deviation (SD) of unloaded and FA loaded NLC measured before and after purification.

| Batch   | After preparation  |                   |                   | After centrifugation |                   |                   |
|---------|--------------------|-------------------|-------------------|----------------------|-------------------|-------------------|
|         | Zave (nm) $\pm$ SD | PDI $\pm$ SD      | ZP $\pm$ SD       | Zave (nm) $\pm$ SD   | PDI $\pm$ SD      | ZP $\pm$ SD       |
| NLCa    | 122.51 $\pm$ 5.98  | 0.101 $\pm$ 0.007 | - 4.85 $\pm$ 0.15 | 125.01 $\pm$ 6.2     | 0.170 $\pm$ 0.018 | - 5.18 $\pm$ 0.15 |
| NLCb    | 99.88 $\pm$ 1.33   | 0.089 $\pm$ 0.015 | - 5.02 $\pm$ 0.02 | 98.36 $\pm$ 1.40     | 0.123 $\pm$ 0.020 | - 5.25 $\pm$ 0.02 |
| FA-NLCa | 87.77 $\pm$ 6.30   | 0.167 $\pm$ 0.061 | - 2.53 $\pm$ 0.03 | 95.02 $\pm$ 1.65     | 0.172 $\pm$ 0.033 | - 3.01 $\pm$ 0.02 |
| FA-NLCb | 62.86 $\pm$ 0.75   | 0.056 $\pm$ 0.012 | - 2.09 $\pm$ 0.05 | 71.74 $\pm$ 1.85     | 0.099 $\pm$ 0.027 | - 2.89 $\pm$ 0.03 |

Each value is the average of six replicates. \*Significance for  $p < 0.05$ , comparison between NLC analyzed before and after centrifugation.

**Table S3.** Common vibrational modes.

| Functional group mode                                  | Approximate wave number (cm <sup>-1</sup> ) |
|--------------------------------------------------------|---------------------------------------------|
| -CH <sub>3</sub> , symmetric and antisymmetric stretch | 2920-2960                                   |
| -CH <sub>3</sub> , symmetric and antisymmetric stretch | 2850-2890                                   |
| -PO <sub>2</sub> , symmetric and antisymmetric stretch | 1080-1200                                   |
| -C-C-                                                  | 1050-1150                                   |
| -C-O-                                                  | 1410                                        |
| -C=O                                                   | 1720                                        |
| -COH                                                   | 870-890                                     |
| -OH                                                    | 1080-1090                                   |
| -CH <sub>2</sub> -, deformation                        | 1460-1470                                   |
